# Supplementary material
Source: publisher site journal article supplement (http://www.degruyter.com/publication/journal_key/SPMA/downloadAsset/SPMA_CFP%20Combinatorial%20Matrices.pdf)
Supplement: Supplementary file 1 [file SPMA_CFP%20Combinatorial%20Matrices.pdf]



## COMBINATORIAL MATRICES

### GUEST EDITORS

---

Wenchang Chu, Università del Salento, Lecce, Italy; [wenchang.chu@unisalento.it](mailto:wenchang.chu@unisalento.it)

Emrah Kılıç, TOBB University of Economics and Technology, Ankara, Turkey; [ekilic@etu.edu.tr](mailto:ekilic@etu.edu.tr)

Helmut Prodinger, Stellenbosch University, Matieland, South Africa; [hprodinger@sun.ac.za](mailto:hprodinger@sun.ac.za)

### DESCRIPTION

---

This special issue is devoted to combinatorial matrices. Combinatorial matrices cover all type of matrices involving some combinatorial information related to specific patterns, permutations and combinatorics in general, Hadamard matrices and Hadamard designs, Latin squares, graph theory, or alternating sign matrix, among others, and their linear algebraic properties.

### HOW TO SUBMIT

---

All manuscripts are subject to the standard peer review process before publication.

Manuscripts should be submitted via <http://www.editorialmanager.com/spma>.

When entering your submission (via online submission system), please choose the option “SI - Combinatorial Matrices”.

Deadline for submissions: **October 31th, 2020**
